# Supplementary material
Source: Research Square preprint supplement (doi:10.21203/rs.3.rs-8778674/v2)
Supplement: Supplementary file 2 [file a4feda99631bfd650cfbfc7e.docx]

**Guidelines for the identification of events in reports**

## **General instructions**

- The goal of this task is to identify and describe the impacts of natural hazards on population, infrastructures, agriculture and the economy using operational reports from the IFRC as a source.
- Each entry (row) of this database should correspond to specific impacts described in the reports.
- Each column corresponds to specific information that we aim to extract for each described impact. For each column, refer to the description of the field and its datatype in the description column section. The general structure of the database can be described in the following table:

| **impactSubType** | **impactValue** | **impactUnit** | **impactValuePrecision** | **impactValueMin** | **impactValueMax** |
| --- | --- | --- | --- | --- | --- |
| str | float or None | str or None | str | float or None | float or None |
| Category of impact (from a predefined list) | quantification of impact | unit of impactValue | Flag describing whether the impactValue is exact or approximate | Lower bound estimate of the impactValue | Upper bound estimate of the impactValue |

| **country** | **location** | **startYear** | **startMonth** | **startDay** | **endYear** | **endMonth** | **endDay** | **hazards** |
| --- | --- | --- | --- | --- | --- | --- | --- | --- |
| list | list | int or None | int or None | int or None | int or None | int or None | int or None | list |
| list of countries affected by the described impact | list of subnational locations affected by the described impact | start year of impact | start month of impact | start day of impact | end year of impact | end month of impact | end day of impact | list of hazards associated with the described impact (from a predefined list) |

| **annotation** | **appealCode** | **reportDate** |
| --- | --- | --- |
| list | str | str |
| list of annotation used for information extraction | appeal code of IFRC report | date of the report in YYYY/MM/DD format |

- Be sure to report impacts that result from natural hazards, i.e. a description of a situation that is not related to the list of pre-defined [hazards](#_2s6r53ihrgdp) should not be included (note that we also include “epidemics” and “conflicts” as hazards).
- If a text reports a road being impacted or cut off between two locations, in a certain area, report the location as the area, and the two locations. E.g. *Giade alone saw more than 300 homes damaged, and crucial infrastructure, including the road to Azare, was cut off.* -> locations=[“Giade”, “Azare”]
- In case a table is present in the text and it’s not clear how it should be labelled, you can use the PDF format.
- Qualitative impacts over the same impactSubtype corresponding to the same event should be gathered in a unique row. Locations and hazards should be combined in the list; dates should correspond to the earliest and latest found. In case the qualitative row is gathering distinct impacts that occurred at clearly distinguishable dates that are distant from each other, you can separate the qualitative row by the distinct dates.
  E.g. *Healthcare services in Abuhamad were already severely impacted in the floods of July 2020. [...] The recent floods of November 2025 impacted healthcare infrastructure in Abuhamad.* => this can be labelled as two separate qualitative rows.
  E.g. “*Over the past 2 years, Argentina has experienced successive droughts, severely impacting the water infrastructures*” → This would be labelled as a unique qualitative row with the impact starting in 2023 and ending in 2025, if the report were issued in 2025

## **Notes on report selection**

- The IFRC identifies unique events using “appeal codes”. For each event, different reports can be issued, as the situation on the field evolves. The different report types (=“appeal types”) are the following: 'DREF Operation Final Report', 'Operations Update', 'DREF Operation Update', 'DREF Operation', ‘Final Report’, ‘Emergency Appeal Revision’.
- For the labelling, we select the latest reports per appealCode

## **Description columns**

- The desired structure for the database is summarised in the table above. For each description of an impact, you must fill in all the columns. Respect the data types and data format of each column, as well as the value restrictions (i.e. on impactSubType and hazards)
- For each column to be filled, you will find a description of the field as well as instructions on how to fill in this field below:

### **Metadata**

#### **appealCode**

Appeal code of the IFRC report.

*Example : “MDRDZ011”*

#### reportDate

Date of the report. Format should be “YYYY/MM/DD”

*Example : “2025/01/01”*

#### **annotation**

Provide the text excerpt from which you extracted the impact, location and date information. Include all the sentences that were used for the identification.

*Example : ['More than 5380 communities and 511610 families were affected by drought']*

### **Impacts**

- An impact is described by its value (“impactValue”), the unit of the value (“impactUnit”), the precision of the value (“impactValuePrecision”), its uncertainty range (“impactValueMin” and “impactValueMax”), and a (sub)type categorising the described impact (“impactSubtype)
- For numeric fields (impactValue, impactValueMin, impactValueMax), use integers or floats; do not use commas (e.g., 1000 instead of 1,000), convert spelt numbers to numerics (e.g. “three” -> 3, “thousand” -> 1000)
- Keep the exact level of aggregation as in the text, e.g. if the text says “100 people have been affected in region A, including 80 in village B and village C, write one row with “100 people” in region A, and one row “80 people” in village B and C.
- If an impact for an impact category can be identified but not quantified with a numerical value, insert None for the “impactValue” field.

#### **impactSubtype**

(Sub)Type of the impact described in the row. Pick only one of the following:

| [  “Targeted People”,  “Assisted People”,  “DREF Allocation & Funding requirements”,  "Affected People",  "Injured People",  "Displaced People",  "Homeless People",  "Missing People",  "Human Deaths",  "Human Health and Wellbeing",  “Infected and Ill People”,  ~~“Other Human Impacts”,~~  "Road Infrastructure",  "Other Transportation Infrastructure",  "Water, Sanitation, and Hygiene Infrastructure",  "Healthcare Infrastructure",  "IT and Communication Infrastructure",  "Residential Buildings",  "Informal Settlements",  "Education Infrastructure",  "Power and Energy Production Infrastructure",  “Undefined Infrastructure”,  ~~"Agricultural Infrastructure",~~  “Other Infrastructure Impacts”  "Crop Production and Forestry",  "Affected Livestock and Animals",  ~~“Other Agricultural Impacts”,~~  "Recreation, Tourism, and Culture",  ~~"Other Economic Activity & Livelihood Production"~~  “Economy and Livelihood”,  "Access to Healthcare",  "Access to Water, Sanitation, and Hygiene"  "Mobility and Access to Transport",  "Water Quality and Availability",  "Access to Education",  "Access to Power and Energy",  “Access to Food”  “Undefined Service Access”] |
| --- |

You can find a description of each impactSubType below:

##### **“Response and funding” :**

- **Targeted People**: The number of people targeted by recovery or response measures after the event.
- **Assisted People**: The number of people assisted by recovery or response measures after the event.
- **DREF Allocation & Funding requirements**: The DREF allocation or funding requirements for the event in CHF or other currency.

##### **"Human":**

The impacts on the human population resulting from the hazards.

- **Affected People**: Total number of individuals impacted by the hazard event. Example: *"According to the assessment of the Red Cross branches, more than 15,432 people (5,144 households) were affected"*

Annotation: Affected People: 15432

- **Injured People**: Number of people injured, including those hospitalised or admitted.
- **Displaced People**: Number of people forcefully displaced or evacuated before or following the event.
- **Homeless People:** Number of people losing housing following the event.
- **Missing People**: Number of people unaccounted for following the event.
- **Human Deaths**: Number of fatalities caused by the hazard.

Example: *"Scope and Scale According to official reports from the National Unit for Disaster Risk Management (UNGRD), the presence of the La Niña phenomenon, between 1 August 2021 and 21 April 2023, left the following effects in the country: 350 people dead, 417 injured, 61 people missing, 315,109 families and 920,656 people affected, 145,453 houses damaged and 7,273 destroyed, 3,886 roads affected, 461 vehicle bridges and 359 pedestrian bridges impacted, 627 aqueducts and 166 sewers affected, 83 health centres and 545 education damaged, 207 community centres impacted and 82,439 hectares of productive land affected"*

Annotation:
Injured People: 417;

Missing People: 61;

Human Deaths: 350

- **Infected and Ill People** : Number of people contaminated (cases) by an infectious disease.
- **Human Health and Wellbeing :** Generic impacts on human health (physical, mental) or wellbeing not necessarily associated with the spread of an infectious disease.

##### **"Infrastructure":**

The impacts on the built infrastructure resulting from the hazards.

- **Road Infrastructure:** Roads and road infrastructure (e.g. bridges, highways..) impacted by a hazard.
- **Other Transportation Infrastructure:** Transportation infrastructure, other than roads, impacted by a hazard. *For example : Railways, airport, ferries, cars…*
- **Water, Sanitation, and Hygiene Infrastructure:** Number of water, sanitation, and hygiene infrastructure, such as sewage networks, drainage systems, wastewater treatment plants, etc. impacted by a hazard.
- **Healthcare Infrastructure:** Number of healthcare infrastructures, such as hospitals, healthcare centres, pharmacies, clinics, etc. impacted by a hazard.
- **IT and Communication Infrastructure:** Number of IT and communication infrastructures, such as data centres, communication towers, and cables, impacted by a hazard.
- **Residential Buildings:** Number of residential buildings impacted by a hazard. This category also encompasses the impact on houses.
- **Informal settlements:** Number of informal settlements, such as refugee camps, slums, tents, etc., impacted by a hazard. This category doesn’t capture the number of shelters created because of the hazard. For example: “70 people have been relocated in 55 shelters” should be labelled as “70 people” in the impactSubtype “Displaced People”.
- **Education Infrastructure:** Number of education infrastructures, such as schools, universities, etc. impacted by a hazard.
- **Power and Energy Production Infrastructure:** Number of energy production infrastructures, such as power plants, turbines, grids, pipelines, etc., impacted by a hazard.
- **Undefined Infrastructure:** Any identified impact on infrastructure where the type of infrastructure impacted is not clearly defined, e.g. critical infrastructure, public infrastructure, etc.

##### **"Service access":**

The impacts on the provision of basic services to the population resulting from the hazards.

- **Access to Healthcare**: People losing the ability to obtain needed medical services, including preventative care, emergency services …
- **Access to Food**: People losing access to a secure food supply
- **Mobility and Access to Transport**: People losing the capacity to move safely and efficiently between locations.
- **Water Quality and Availability**: People losing safe, clean, and consistent supply of water for drinking, sanitation, and other essential uses.
- **Access to Water, Sanitation, and Hygiene**: People losing access to water, sanitation, and hygiene services.
- **Access to Education**: People losing the ability to attend educational institutions and receive instruction.
- **Access to Power and Energy**: People losing access to electricity, gas, or other energy sources necessary for households, businesses, and public services.
- **Undefined Service Access**: Any identified impact on service access where the type of service impacted is not clearly defined, e.g. access to basic services.

##### **"Agriculture":**

The impacts on agriculture resulting from the hazards.

- **Crop Production and Forestry:** Number of crops, agricultural production and forest impacted by a hazard
- **Affected Livestock and Animals:** Total number of animals, including terrestrial and aquatic species, impacted by the hazard. (*e.g. loss, death, perished animals or fishes)*

##### **"Economic Activity & Livelihood Production":**

The impacts on the economy and livelihood resulting from the hazards.

- **Recreation, Tourism, and Culture:** Tourist attractions and cultural sites impacted by a hazard.
- **Economy and Livelihood:** Any identified impact on the economy or living conditions resulting from a natural hazard.

#### **impactValue**

The numerical value quantifying the impact described in the row, if available. Write None if the impact is qualitative or if the quantity is unknown (e.g. “several people” would default to impactValue=None, impactUnit=”people”). Write the exact value when an exact value is provided; if the impact is a range, keep None but fill the impactValuePrecision, impactValueMin and impactValueMax fields.

Example:

- “1920 buildings destroyed” -> impactValue = 1920, impactValuePrecision=”exact”, impactValueMin = impactValueMax = None;
- “several millions of people affected” -> impactValuePrecision=”approx”, impactValueMin=1000000, impactValueMax=impactValue=None; “
- 10 to 20 people have been affected” -> impactValue=None, impactValuePrecision=”approx”, impactValueMin=10, impactValueMax=20

#### **impactValuePrecision**

The flag describing whether the extracted impactValue is exact or approximate. Write “**exact**” if the extracted value is exact, “**approx**” when it is a range or an approximation, and None when no value has been extracted or you cannot identify the level of precision.

#### **impactValueMin**

The lower bound of the impactValue when a range or an approximated value is provided. Write None if the impactValue is exact or if no range can be identified.

Example:

- “more than 19103 people affected” -> impactValueMin = 19103, impactValueMax = impactValue = None

#### **impactValueMax**

The upper bound of the impactValue when a range or an approximated value is provided. Write None if the impactValue is exact or if no range can be identified.

Example:

- “up to 100 roads have been blocked” -> impactValuePrecision=”approx”, impactValueMax=100, impactValueMin=impactValue=None

#### **impactUnit**

The unit attached to the impactValue of the described impact. It MUST be filled if an impactValue is provided, but can be None if the impact is qualitative.

- For units including metric units (i.e. standard units referring to length, mass, surface or volume), write both the metric unit and the quantity it measures: “<metric unit> of <measured quantity>”. *Example : “squared meters of crops” -> “squared meters of crops” and not “squared meters”*
- For units including buildings (such as houses), if available, label both the type of infrastructure impact and the degree to which it has been impacted as follows: “<infrastructure > <measured damage>”. *Example :
  “More than 2,300 houses collapsed, and 19,000 were damaged to varying degrees.'” -> This sentence should be labelled as two impact entries : “houses collapsed” for the 1st impact and “houses damaged” for the 2nd.*
- If the damage is given in several units, favor CHF over other currencies, number of people over number of households or families, metric units over other types of units (e.g. meters over miles) *Example :
  “The direct economic loss was estimated to be over 5.3 billion Yuan approximately CHF 792 million.'” -> 792 000 000 “CHF” “About 2,618 families that is 18,326 people have been affected.'” -> 18 326 “people”*
- Try to report the unit exactly as written in the text, unless you find it unclear or confusing. If this is the case, you can write it in the comments.
- We aim to simplify and standardize the extracted impacts to a specific set of units (see below). Hence, any impact figure that is described at a level finer than what we aim to keep in the final database can be simplified and aggregated during the labelling. For instance, *9 national roads and 10 bridges have been affected* can be included as “19 roads and bridges” or “19 road infrastructure”. Impacts that are described at the same level of detail of one of the final unit but that are in different units should be kept as is and will be converted during post-processing, e.g. *economic losses amounted to 10 million pesos* should be included as “10000000 pesos” (will be later converted to CHF)

| impactUnit_list = ["people", |
| --- |
| "road infrastructure", |
| "km of road infrastructure", |
| "other transportation infrastructure", |
| "km of other transportation infrastructure", |
| "water, sanitation and hygiene infrastructure", |
| "healthcare infrastructure", |
| "IT and communication infrastructure", |
| "houses", |
| "education infrastructure", |
| "agricultural infrastructure", |
| "power and energy production infrastructure" |
| "other infrastructure" |
| "recreation, tourism, and culture infrastructure" |
| "% of inflation" |
| "CHF" |
| "kg of crops or forestry", |
| "km**2 of crops or forestry ", |
| "affected animals", |
| "trees" |
| ] |

**Locations**

- For the location, try to correctly match the described impact to where it occurred, at the correct level of aggregation (e.g. cities, divisions, regions, countries). If the impact is clearly identified for a finer location (e.g. in a city) but the region/division in which the city can be found is given, only give the finer location (e.g. for the sentence “100 people impacted in Madrid, central region”, only “Madrid” should be kept in the locations as “Madrid” < “Central Region” ). If you are unsure to which location the described impacts correspond, you can write all the locations that you find in the sentence, irrespective of their level of aggregation (e.g. for “1000 people have been affected in the central and northern regions, including the cities of Madrid and Valencia”, keep all mentioned locations in the location field ).
- Please retain the locations as mentioned in the text, including the type of administrative geographical area. E.g. “Cameroon's Far North region” -> “Far North region”, “Logone et Chari and Mayo Danay divisions” -> “Logone et Chari division”, “Mayo Danay division”.

#### **country**

Name of the country. List of string with double quote

*Example : [“Lao People’s Democratic Republic”] or [“Pakistan”, “India”]*

#### **location**

Location affected by the impact. The locations can be of several granularities, from region to city. If several locations are affected by the same impact, write them in the same list. The location should always be in a list format.

*Example : If the country is “Pakistan” regions could be “Balochistan”, “Sindh”, and cities can be [“Sohbatpur”, “Jafarabad”, “Sanghar”, “Dadu”, “Jacobabad”, “Naushahro Feroz”, “Ghotki”, “Sukkur”, “Sanghar”, “Badin”, “Chitral”, “Mansehra”, “D.G. Khan”]*

If no location can be identified, fill with None

### **Dates**

- Regarding the extraction of the dates of the impact, try to associate a specific start and end date to the event resulting in the described impact.
- If no specific starting date is mentioned, write the overall starting date of the event (it is usually mentioned at the start of the report).
- For the end date, try to take the end date of the event or the date at which the impact has been reported (e.g. 'According to reports from National Disaster Reduction Commission, as of 13 July 2018, the floods affected 1,381,000 people’ the end date should be 13/07/2018).
- If you consider the impacts that occurred on a single day, repeat the same date for both the start and end dates.
- If you cannot identify the dates with enough precision, leave the date fields as None. This will default to the earliest and latest dates mentioned in the report.

#### startYear

Starting year of the event leading to the described impact. Must be numerical.

*Example : 2024*

#### startMonth

Starting month of the event leading to the described impact. Must be numerical.

*Example : 7*

If no month if found put None

If the beginning of the event is vague, infer it.

*Example : “Middle of the year” → 7*

#### startDay

Starting day of the event leading to the described impact. Must be numerical

*Example : 1*

If no month if found put None

If the beginning of the event is vague, infer it.

*Example : “Beginning of the month” → 1*

*“Middle of the month” → 15*

*“End of the month” → 30 (or 29 if february)*

#### endYear

End year of the event leading to the described impact or date of the reporting. Must be numerical.

*Example : 2024*

If no end year is found put None

#### endMonth

Starting month of the event leading to the described impact or date of the reporting. Must be numerical.

*Example : 8*

If no end month is found put None

#### endDay

Starting day of the event leading to the described impact or date of the reporting. Must be numerical

*Example : 8*

If no end month is found put None

### Hazards

#### hazards

List of hazards mainType to which the impact can be associated. Must be chosen from the following categories :

*["Drought", "Wildfire", "Earthquake", "Mass movement", "Volcanic activity", "Flood", "Wave action", "Extreme warm temperature", "Extreme cold temperature", "Tropical storm", Convective storm”, "Other storm", "Epidemic", “Conflicts”]*

At least one hazard should be identified as the cause of the described impact. If unsure, write several hazards

Definition of the hazards:

| **Hazard** | **Description** |
| --- | --- |
| **Drought** | Prolonged lack of precipitation |
| **Wildfire** | Uncontrolled natural fires |
| **Earthquake** | Sudden tectonic shifting. Include as well tsunami |
| **Mass movement** | Any type of downslope movement of earth materials. Includes Landslides and rockfalls |
| **Volcanic activity** | Eruptions and related phenomena |
| **Flood** | River, coastal, flash and ice jam flooding |
| **Wave action** | Wind-generated surface waves (e.g. Rogue waves, seiche) |
| **Extreme warm temperature** | Prolonged, abnormally high heat |
| **Extreme cold temperature** | Prolonged, abnormally low cold |
| **Tropical storm** | Tropical cyclonic storms (e.g tropical cyclone, tropical storm, hurricanes, typhoons) |
| **Convective storm** | Convective-related storms (e.g. severe convective storms, derechos, hail, tornado) |
| **Other storm** | Any type of storm which does not correspond to a tropical cyclone or convective storm (e.g. extra-tropical storm, snow storm…) |
| **Epidemic** | Sudden outbreak of disease |
| **Conflicts** | Disagreements or disputes between different groups, organizations, or states |
